# Supplementary material for: Ergonomic Risk Prioritization of Work-Related Musculoskeletal Disorders in Lead-Acid Battery Manufacturing: A Cross-Sectional and Observational Study
Source: Research Square preprint supplement (doi:10.21203/rs.3.rs-8654310/v1), 2026-02-19
Supplement: Supplementary file 1 [file 1b96e6768e54339d5e7f5972.docx]

**Table 1 Multivariate logistic regression analysis of factors associated with low back WMSDs**

| **No.** | **Variable** | ***OR*** | ***95%CI*** | | ***P*** |
| --- | --- | --- | --- | --- | --- |
| **Lower** | **Upper** |
| 1 | Monthly income (RMB) |  |  |  |  |
|  | <3000 | 1.000 |  |  | 0.048 |
|  | 3000~ | 0.860 | 0.359 | 2.061 | 0.735 |
|  | 5000~ | 0.605 | 0.260 | 1.405 | 0.242 |
| 2 | Physical exercise |  |  |  |  |
|  | No | 1.000 |  |  | 0.001 |
|  | Occasionally | 0.642 | 0.495 | 0.833 | 0.001 |
|  | Regularly | 0.579 | 0.370 | 0.906 | 0.017 |
| 3 | Smoking status |  |  |  |  |
|  | No | 1.000 |  |  | 0.024 |
|  | Occasionally | 1.727 | 1.147 | 2.603 | 0.009 |
|  | Regularly | 0.983 | 0.752 | 1.286 | 0.902 |
|  | Former smoker | 2.332 | 0.803 | 6.766 | 0.119 |
| 4 | Self-rated health status |  |  |  |  |
|  | Very good | 1.000 |  |  | <0.001 |
|  | Fair | 2.108 | 1.624 | 2.737 | 0.000 |
|  | Poor | 2.222 | 0.579 | 8.521 | 0.244 |
| 5 | Prolonged standing | 0.946 | 0.718 | 1.247 | 0.695 |
| 6 | Back posture |  |  |  |  |
|  | Upright back | 1.000 |  |  | 0.716 |
|  | Slightly flexed (20°–60°) | 1.112 | 0.844 | 1.463 | 0.451 |
|  | Severely flexed (>60°) | 1.157 | 0.745 | 1.797 | 0.516 |
| 7 | Frequent trunk rotation | 1.254 | 0.931 | 1.689 | 0.137 |
| 8 | Frequent bending combined with twisting | 1.169 | 0.879 | 1.553 | 0.283 |
| 9 | Repetitive trunk movements | 0.822 | 0.619 | 1.093 | 0.177 |
| 10 | Prolonged static back posture | 1.544 | 0.974 | 2.445 | 0.064 |
| 11 | Prolonged trunk flexion | 0.831 | 0.506 | 1.365 | 0.465 |
| 12 | Prolonged trunk rotation | 0.960 | 0.570 | 1.618 | 0.878 |
| 13 | Neck posture |  |  |  |  |
|  | Upright | 1.000 |  |  | 0.635 |
|  | Slight forward flexion (10°–20°) | 1.219 | 0.877 | 1.695 | 0.238 |
|  | Severe forward flexion (>20°) | 1.144 | 0.716 | 1.828 | 0.574 |
|  | Neck extension | 1.762 | 0.328 | 9.457 | 0.509 |
| 14 | Prolonged static neck posture | 0.904 | 0.546 | 1.497 | 0.696 |
| 15 | Prolonged head-down posture | 0.610 | 0.294 | 1.265 | 0.184 |
| 16 | Prolonged head rotation | 0.872 | 0.524 | 1.451 | 0.598 |
| 17 | Prolonged knee flexion | 1.957 | 0.966 | 3.966 | 0.062 |
| 18 | Repetitive lower limb and ankle movements | 1.177 | 0.723 | 1.918 | 0.512 |
| 19 | Tasks requiring forceful upper limb/hand exertion | 1.017 | 0.767 | 1.348 | 0.907 |
| 20 | Manual handling of heavy loads | 1.828 | 1.374 | 2.432 | 0.000 |
| 21 | Manual handling of very heavy loads | 1.166 | 0.813 | 1.672 | 0.404 |
| 22 | High-frequency repetitive operations (per minute) | 1.411 | 1.076 | 1.851 | 0.013 |
| 23 | Tasks requiring pinching or gripping tools/objects | 1.093 | 0.798 | 1.497 | 0.580 |
| 24 | Frequent overtime work | 1.350 | 1.055 | 1.727 | 0.017 |
| 25 | Adequate rest time | 0.472 | 0.363 | 0.615 | <0.001 |
| 26 | Ability to decide break timing autonomously | 0.946 | 0.728 | 1.227 | 0.674 |
| 27 | Staff shortage | 0.905 | 0.664 | 1.234 | 0.529 |
| 28 | Exposure to cold or temperature variation | 1.560 | 1.042 | 2.335 | 0.031 |

**Table 2 Multivariate logistic regression analysis of factors associated with wrist WMSDs**

| **No.** | **Variable** | ***OR*** | ***95%CI*** | | ***P*** |
| --- | --- | --- | --- | --- | --- |
| **Lower** | **Upper** |
| 1 | Length of service (years) |  |  |  |  |
|  | <5 | 1.000 |  |  | 0.005 |
|  | 5~9 | 0.773 | 0.584 | 1.022 | 0.071 |
|  | 10~ | 0.529 | 0.349 | 0.801 | 0.003 |
| 2 | Physical exercise |  |  |  |  |
|  | No | 1.000 |  |  | 0.102 |
|  | Occasionally | 1.004 | 0.772 | 1.307 | 0.975 |
|  | Regularly | 0.577 | 0.344 | 0.966 | 0.036 |
| 3 | Smoking status |  |  |  |  |
|  | No | 1.000 |  |  | <0.001 |
|  | Occasionally | 1.113 | 0.710 | 1.745 | 0.641 |
|  | Regularly | 0.485 | 0.356 | 0.662 | 0.000 |
|  | Former smoker | 1.229 | 0.410 | 3.684 | 0.713 |
| 4 | Self-rated health status |  |  |  |  |
|  | Very good | 1.000 |  |  | 0.802 |
|  | Fair | 1.004 | 0.744 | 1.355 | 0.979 |
|  | Poor | 1.578 | 0.410 | 6.07 | 0.507 |
| 5 | Wrist flexion or extension | 0.817 | 0.522 | 1.279 | 0.377 |
| 6 | Prolonged wrist flexion | 1.417 | 1.092 | 1.839 | 0.009 |
| 7 | Wrist frequently resting on hard or sharp edges | 1.103 | 0.818 | 1.489 | 0.519 |
| 8 | Tasks requiring forceful upper limb or hand exertion | 1.091 | 0.789 | 1.509 | 0.598 |
| 9 | Manual handling of heavy loads | 1.538 | 1.136 | 2.081 | 0.005 |
| 10 | Manual handling of very heavy loads | 1.509 | 1.135 | 2.006 | 0.005 |
| 11 | High-frequency repetitive operations (per minute) | 1.214 | 0.913 | 1.614 | 0.183 |
| 12 | Tasks requiring pinching or gripping tools/objects | 1.860 | 1.253 | 2.76 | 0.002 |
| 13 | Frequent overtime work | 1.146 | 0.882 | 1.488 | 0.308 |
| 14 | Adequate rest time | 0.590 | 0.445 | 0.784 | <0.001 |
| 15 | Ability to decide break timing autonomously | 1.051 | 0.799 | 1.383 | 0.722 |
| 16 | Staff shortage | 1.334 | 0.981 | 1.814 | 0.066 |
| 17 | Exposure to cold or temperature variation | 1.209 | 0.797 | 1.834 | 0.372 |

**Table 3 Identification of ergonomic risk factors affecting different body regions among key job positions**

| **Work section** | **Job position** | **No. of hazard factors** | **Neck, shoulder & upper back** | **Elbow, forearm & wrist** | **Foot** | **Knee & hip** | **Low back** |
| --- | --- | --- | --- | --- | --- | --- | --- |
| Plate processing | Coating (lower plate) | 24 | 2, 4, 9b, 9d, 11a, 11b, 11d, 14a, 15a | 2, 14a, 15a, 17a, 17b | 6 | 6 | 2, 4, 6, 9b, 9d, 11a, 11b, 11d |
| Assembly | Cover sealing | 18 | 9b, 10a, 11a, 11b, 12, 14a, 15a, 15b | 12, 14a, 15a, 15b, 17b, 17c | None | None | 9b, 11a, 11b, 12 |
| Plate processing | Wrapping | 16 | 9c, 11b, 12, 14a, 15a | 12, 14a, 15a, 17b | 6 | 6 | 2, 6, 9b, 9c, 12 |
| Plate processing | Slicing (lower plate) | 15 | 4, 9b, 10a, 11b, 12, 14a, 15a | 12, 14a, 15a, 17b | None | None | 4, 9b, 11a, 11b, 12 |
| Plate processing | Coating (upper plate) | 15 | 9c, 11b, 12, 14a, 15a | 12, 14a, 15a, 17b | 6 | 6 | 6, 9c, 11b, 12 |
| Assembly | Mechanical casting and welding | 15 | 9c, 11b, 12, 14a, 15a, 15b | 12, 14a, 15a, 15b, 17b | 6 | 6 | 6, 9c |
| Assembly | Battery hoisting | 15 | 9b, 9c, 10a, 11a, 11b, 12, 14a, 15a | 12, 14a, 15a, 17b | None | None | 9b, 9c, 12 |
| Formation | Charging | 15 | 2, 4, 10b, 14a | 2, 14a, 15b, 17a, 17c | 2 | 2 | 2, 4, 9b, 9c |
| Packaging | Battery loading (upper) | 15 | 9c, 10a, 11a, 11b, 12, 14a, 15a | 12, 14a, 15a, 17b | 6 | 6 | 6, 9c |
| Plate processing | Slicing (upper plate) | 14 | 4, 9b, 11b, 12, 14a, 15a | 12, 14a, 15a, 17b | None | None | 4, 9b, 11b, 12 |
| Formation | Tank unloading | 14 | 9c, 10a, 12, 14 | 12, 14a, 15a, 17a, 17b | 6 | 6 | 6, 9c, 12 |
| Formation | Acid extraction | 14 | 5, 9a, 9c, 10a, 13, 14a, 15b | 2 | 2 | 2 | 4, 5, 9a, 9c |
| Packaging | Battery unloading | 14 | 4, 9b, 12, 14a, 15a | 12, 14, 15a, 17b | None | None | 4, 9b, 9c, 11d, 12 |
| Grid casting | Negative plate die casting | 13 | 9b, 12, 14b, 15a | 12, 14b, 15a | 6 | 6 | 6, 9b, 9c, 12 |
| Formation | Acid filling | 13 | 9a, 10a, 11b, 12, 14a, 15a | 12, 14a, 15a, 17b | None | None | 9a, 11b, 12 |
| Plate processing | Wrapping material collection | 11 | 9d, 14a, 15b | 12, 14a, 15b, 17b | 6 | 6 | 6, 9d |
| Grid casting | Plate casting | 10 | 9b, 10a, 12, 14a, 15a | 12, 14a, 15a | None | None | 9b, 12 |
| Assembly | Manual casting and welding | 10 | 9c, 10a, 15b, 16 | 15b, 17a | 6 | 6 | 6, 9c |
| Plate processing | Coating (weighing) | 9 | 9c, 10b, 14a | 14a, 17a | 6 | 6 | 6, 9c |
| Assembly | Terminal welding | 9 | 13, 14a, 16 | 13, 14a | 6 | 6 | 6, 9b |
| Plate processing | Paste mixing | 8 | 3, 10b, 14a | 3, 12, 14a | None | None | 9b, 12 |
| Assembly | Short-circuit repair | 7 | 9a, 9b, 10a, 14a, 16 | None | None | None | 9a, 9b |
| Formation | Battery testing | 6 | 9a, 10a, 14b, 16 | 14b, 15b | None | None | None |

None indicates that no corresponding ergonomic hazard factor was identified for the specific body region.
